# Supplementary material for: Artemisinin Resistance in Plasmodium falciparum Malaria
Source: Atypon-hosted journal article supplement (doi:10.1056/nejmoa0808859), 2009-07-29

## Supplementary Appendix

This appendix has been provided by the authors to give readers additional information about their work.

Supplement to: Dondorp AM, Nosten F, Yi P, et al. Artemisinin resistance in *Plasmodium falciparum* malaria. N Engl J Med 2009;361:455-67.

## SUPPLEMENTAL TABLES AND FIGURE

**Table S1.**

Baseline characteristics of patients recruited in Pailin according to age group (children <16 years versus adults). Numbers are mean (95% CI) unless otherwise stated. \* Mann-Whitney U test; † median (range); †† geometric mean (95% CI). AS7 is artesunate 2mg/kg/day for 7 days. MAS3 is artesunate 4mg/kg/day for 3 days, followed by mefloquine 15mg/kg on day 3 and 10 mg/kg on day 4 after admission.

|                                | Adults                      |                             | Children                   |                             | p-value<br>Adults v<br>children |
|--------------------------------|-----------------------------|-----------------------------|----------------------------|-----------------------------|---------------------------------|
|                                | AS7<br>(n=15)               | MAS3<br>(n=14)              | AS7<br>(n=5)               | MAS3<br>(n=6)               |                                 |
| Male, n<br>(%)                 | 11<br>(73.3)                | 13<br>(92.9)                | 4<br>(80)                  | 3<br>(50)                   | 0.23                            |
| Weight, kg                     | 49.9<br>(46.3, 53.4)        | 50.8<br>(47.5, 54.0)        | 29.8<br>(17.6, 42.0)       | 26.3<br>(21.9, 30.7)        | <0.001                          |
| Age, yrs                       | 31.3<br>(24.9, 37.8)        | 25.8<br>(19.5, 32.0)        | 12.4<br>(9.0, 15.8)        | 11.8<br>(9.5, 14.2)         | <0.001*                         |
| Temperature, °C                | 38.4<br>(38.0, 38.9)        | 38.5<br>(38.0, 39.0)        | 38.9<br>(37.5, 40.2)       | 38.4<br>(37.5, 39.4)        | 0.62                            |
| Hemoglobin, g/dL               | 12.0<br>(10.7, 13.4)        | 13.0<br>(12.1, 14.0)        | 11.4<br>(9.5, 13.2)        | 9.6<br>(7.3, 11.8)          | 0.001                           |
| White blood cells,<br>1000/uL† | 5.3<br>(3.7, 8.9)           | 6.0<br>(3.3, 11.9)          | 5.2<br>(3.7, 8.5)          | 6.7<br>(3.6, 8.9)           | 0.65*                           |
| Platelets,<br>1000/uL†         | 80<br>(17, 357)             | 98.5<br>(40, 181)           | 92<br>(42, 209)            | 130<br>(58, 383)            | 0.20*                           |
| Glucose, mg/dL†                | 99.0<br>(74, 186)           | 96.5<br>(74, 184)           | 96<br>(89, 105)            | 98<br>(87, 169)             | 0.79*                           |
| Creatinine, mg/dL              | 0.95<br>(0.86, 1.04)        | 0.96<br>(0.85, 1.08)        | 0.58<br>(0.52, 0.64)       | 0.43<br>(0.35, 0.52)        | <0.001*                         |
| Bilirubin, g/dL††              | 1.62<br>(1.30, 2.02)        | 1.61<br>(1.25, 2.07)        | 1.29<br>(0.73, 2.28)       | 1.48<br>(0.93, 2.35)        | 0.32                            |
| ALT, u/L†                      | 26<br>(8, 76)               | 17.0<br>(6, 40)             | 22<br>(11, 80)             | 15<br>(11, 22)              | 0.23*                           |
| AST, u/L†                      | 47<br>(30, 149)             | 38.0<br>(34, 65)            | 43<br>(36, 145)            | 36<br>(29, 44)              | 0.30*                           |
| Alk. Phos., u/L†               | 85<br>(54, 186)             | 87<br>(63, 153)             | 158<br>(115, 226)          | 156.5<br>(102, 268)         | <0.001*                         |
| Albumin, g/dL                  | 3.4<br>(3.1, 3.7)           | 4.0<br>(3.8, 4.2)           | 3.6<br>(3.1, 4.2)          | 3.5<br>(3.0, 3.9)           | 0.51                            |
| Parasitemia,<br>/uL ††         | 66404<br>(38936,<br>113251) | 77094<br>(43860,<br>135509) | 57894<br>(9910,<br>338211) | 44324<br>(14793,<br>132808) | 0.33                            |
| Gametocytes n<br>(% positive)  | 4 (26.7)                    | 2 (14)                      | 1 (20)                     | 4 (66.7)                    | 0.14                            |

**Table S2.**

Clinical and parasitological responses in Wang Pha and Pailin, excluding children <16 years from the analysis. Outcomes are median (range) unless otherwise stated. AS7 is artesunate 2 mg/kg/day for 7 days. MAS3 is artesunate 4 mg/kg/day for 3 days, followed by mefloquine 15 mg/kg on day 3 and 10 mg/kg on day 4 after admission. PCT=parasite clearance time. FCT-A= time till first recorded temperature below 37.5°C; FCT-B= time till start of the first full 24 hours with a recorded temperature below 37.5°C; <sup>a</sup> median (interquartile range)- includes only patients positive for gametocytes at any time. <sup>b</sup> Wilcoxon Breslow test for equality of survivor functions. <sup>c</sup> p = 0.002 when adjusted for baseline parasitaemia by stratification.

|                                           | MaeSot (n=40)    |                  | Pailin (n=29)       |                     | p-value<br>Wang Pha<br>v Pailin |
|-------------------------------------------|------------------|------------------|---------------------|---------------------|---------------------------------|
|                                           | AS7<br>(n=20)    | MAS3<br>(n=20)   | AS7<br>(n=15)       | MAS3<br>(n=14)      |                                 |
| Median PCT<br>(IQR), h                    | 54<br>(42, 72)   | 48<br>(30, 54)   | 83.9<br>(54, 102)   | 84.0<br>(66, 90)    | <0.001 <sup>b,c</sup>           |
| PC50, h                                   | 4<br>(1, 24)     | 3<br>(1, 16)     | 11<br>(1, 25)       | 10<br>(1, 22)       | 0.003                           |
| PC90, h                                   | 12<br>(3, 40)    | 11<br>(3, 27)    | 26<br>(9, 39)       | 24<br>(11, 44)      | <0.001                          |
| PRR24<br>(% of admission)                 | 1.1<br>(0, 54.1) | 0.3<br>(0, 15.0) | 21.7<br>(0.3, 97.2) | 13.5<br>(0.9, 67.6) | <0.001                          |
| PRR48<br>(% of admission)                 | 0<br>(0, 3.8)    | 0<br>(0, 0.5)    | 0.9<br>(0, 11.5)    | 0.9<br>(0, 1)       | <0.001                          |
| No. recrudescences<br>(%)                 | 2<br>(10)        | 1<br>(5)         | 5<br>(33.3)         | 1<br>(7.1)          | 0.15                            |
| Gametocyte<br>duration, days <sup>a</sup> | 19<br>(7, 19)    | 13<br>(1, 19)    | 10<br>(7, 20)       | 4<br>(4, 6)         | 0.71 <sup>b</sup>               |
| Median FCT-A<br>(IQR), days               | 1<br>(1, 2)      | 1<br>(1, 2)      | 2<br>(1, 2)         | 1<br>(1, 2)         | 0.29 <sup>b</sup>               |
| Median FCT-B<br>(IQR), days               | 2<br>(1, 2)      | 2<br>(1, 2)      | 2<br>(1, 2)         | 1<br>(1, 2)         | 0.89 <sup>b</sup>               |

**Table S3.**

Adverse events: number (%) of patients experiencing symptoms at least once during antimalarial treatment. \* Cough, pleuritic chest pain, shortness of breath.

|                   | Wang Pha<br>(n=40) |                | Pailin<br>(n=40) |                | p                    | p              |
|-------------------|--------------------|----------------|------------------|----------------|----------------------|----------------|
|                   | AS7<br>(n=20)      | MAS3<br>(n=20) | AS7<br>(n=20)    | MAS3<br>(n=20) | WangPha<br>v. Pailin | AS7 vs<br>MAS3 |
| Dizziness         | 14                 | 19             | 6                | 9              | <0.001               | 0.07           |
| Headache          | 16                 | 19             | 17               | 17             | 0.75                 | 0.52           |
| Nausea            | 9                  | 5              | 15               | 14             | 0.001                | 0.26           |
| Anorexia          | 10                 | 12             | 16               | 11             | 0.25                 | 0.49           |
| Vomiting          | 3                  | 2              | 5                | 5              | 0.25                 | 0.78           |
| Diarrhoea         | 0                  | 0              | 1                | 3              | 0.12                 | 0.62           |
| Itching           | 0                  | 1              | 0                | 1              | 1.0                  | 0.49           |
| Rash              | 0                  | 1              | 0                | 0              | 1.0                  | 1.0            |
| Urticaria         | 0                  | 0              | 0                | 1              | 1.0                  | 1.0            |
| Abdominal<br>pain | 5                  | 1              | 9                | 11             | 0.001                | 0.63           |
| Joint pain        | 10                 | 14             | 3                | 4              | <0.001               | 0.25           |
| Muscle pain       | 14                 | 15             | 7                | 8              | 0.002                | 0.65           |
| Palpitations      | 1                  | 2              | 2                | 0              | 1.0                  | 1.0            |
| Sleepiness        | 8                  | 13             | 5                | 5              | 0.01                 | 0.25           |
| Confusion         | 0                  | 0              | 0                | 0              | -                    | -              |
| Hearing loss      | 3                  | 4              | 2                | 0              | 0.15                 | 1.0            |
| Numbness          | 4                  | 4              | 3                | 2              | 0.55                 | 0.76           |
| Blurred vision    | 0                  | 3              | 2                | 2              | 1.0                  | 0.43           |
| Fatigue           | 2                  | 0              | 13               | 12             | <0.001               | 0.48           |
| Other*            | 0                  | 0              | 5                | 1              | 0.03                 | 0.09           |

**Figure S1.**

Relationship between the summed area's under the time concentration curves of artesunate and DHA and the times to parasite clearance in patients treated with artesunate 2 mg/kg/day for 7 days (AS7; red circles) or 4 mg/kg/day for 3 days followed by mefloquine (MAS3; blue triangles) in Pailin (spearman's rho =0.120, p=0.47, left panel) and Wang Pha (spearman's rho =0.139, p=0.39, right panel).

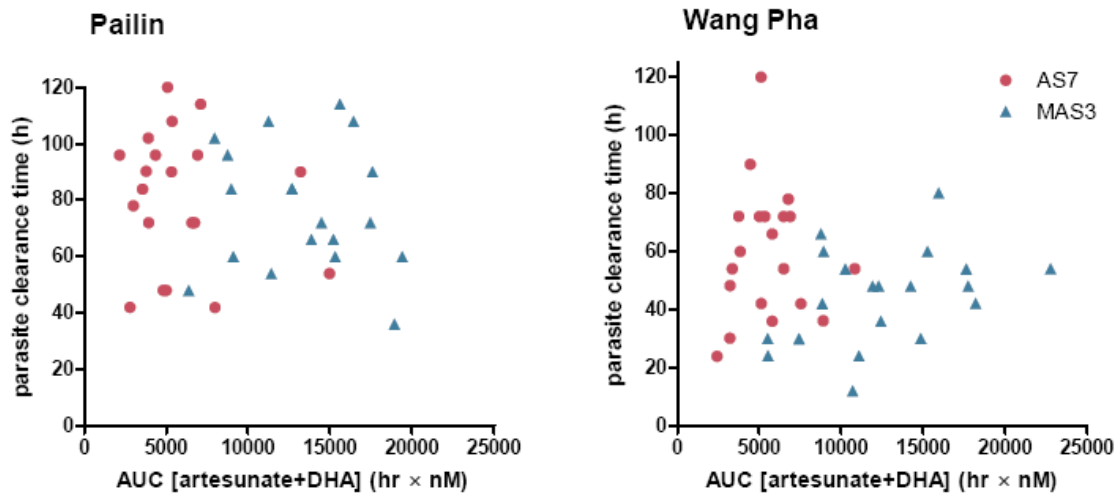

Supplement: nejm_dondorp_455sa1.pdf [file nejm_dondorp_455sa1.pdf]
